# Supplementary material for: Development of a natural preservative obtained from male chestnut flowers: optimization of a heat-assisted extraction technique
Source: Royal Society of Chemistry journal article supplement (doi:10.1039/c8fo02234h), 2019-01-01
Supplement: c8fo02234h1.pdf [file c8fo02234h1.pdf]

## Supplemental material

**Table A1.** Experimental domain and codification of independent variables in the *CCCD* factorial design with 5 range levels.

| <b>CODED<br/>VALUES</b> | <b>NATURAL VALUES</b> |               |              |
|-------------------------|-----------------------|---------------|--------------|
|                         | <i>t (min)</i>        | <i>T (°C)</i> | <i>S (%)</i> |
| <b>-1.68</b>            | 20                    | 25            | 0            |
| <b>-1</b>               | 40,3                  | 37,2          | 20.3         |
| <b>0</b>                | 70                    | 55            | 50           |
| <b>+1</b>               | 99,7                  | 72,8          | 79.7         |
| <b>+1.68</b>            | 120                   | 85            | 100          |

**Table A2.** Mathematical models of the extraction process derived from the second-order polynomial model with interactions of Eq. (1).

|                                   |                                                                                         |          |
|-----------------------------------|-----------------------------------------------------------------------------------------|----------|
| <i>Extraction yield</i>           | $Y_{Yield} = 40.8 + 1.75t + 2.92T - 3.86S - 5.56S^2 + 0.63tS + 0.43TS$                  | Eq. (3)  |
| <i>Hydrolysable tannins (Hta)</i> | $Y_{Elg} = 9.34 - 2.68t + 2.34T - 6.5S + 2.38t^2 - 3.04S^2 + 1.76TS$                    | Eq. (4)  |
| <i>Flavonoids (Fla)</i>           | $Y_{Fla} = 5.56 - 0.72t - 1.12S + 0.53t^2 + 1.28S^2 - 0.65tS + 0.89TS$                  | Eq. (5)  |
| <i>Total Phenolics (Phe)</i>      | $Y_{Phe} = 14.9 - 3.4t + 2.11T - 7.62S + 2.91t^2 + 4.32S^2 - 0.87tS + 2.65TS$           | Eq. (6)  |
| <i>Compound P5</i>                | $Y_{P5} = 0.37 - 0.31t + 0.37t^2 + 0.37T^2 + 0.412S^2 - 0.12tT - 0.39tS + 0.15TS$       | Eq. (7)  |
| <i>Compound P7</i>                | $Y_{P7} = 7.88 - 1.68t + 2.09t^2 - 6.15S + 2.81t^2 + 1.02tT + 1.25tS$                   | Eq. (8)  |
| <i>Compound P8</i>                | $Y_{P8} = 1.22 - 0.17T - 0.43S + 0.33t^2 + 0.28S^2 - 0.2tT - 0.37tS + 0.39TS$           | Eq. (9)  |
| <i>Compound P9</i>                | $Y_{P9} = 1.55 - 0.23t - 0.13T - 0.17S + 0.15S^2 + 0.19tT + 0.14tS + 0.24TS$            | Eq. (10) |
| <i>Compound P11</i>               | $Y_{P11} = 1.06 - 0.06t - 0.29S + 0.19S^2$                                              | Eq. (11) |
| <i>Compound P13</i>               | $Y_{P13} = 0.64 - 0.1t - 0.05T + 0.05S + 0.15S^2 - 0.05tS$                              | Eq. (12) |
| <i>Compound P14</i>               | $Y_{P14} = 0.51 - 0.08t + 0.04T + 0.02S + 0.04t^2 + 0.06S^2 + 0.02tT - 0.04tS + 0.07TS$ | Eq. (13) |
| <i>Compound P1,2,3,4,6,10,12</i>  | $Y_{Minor} = 2.61 - 0.89t - 0.53S + 1.35S^2 - 1.12tT - 1.40tS + 1.53TS$                 | Eq. (14) |

**Table A3:** Parametric results of the dose-response model of Eq. (2) for of all the response values assessed in terms of the variation of the *S/L* ratio: *Extraction yield* (%), T. hydrolysable tannins (*Hta*), T. Flavonoids (*Fla*), T. Phenolics (*Phe*) and major (*P5, P7, P8, P9, P11, P13* and *P14*) and minor (*P1, P2, P3, P4, P6, P10* and *P12*) compounds. The underlined values were obtained with an increasing dose-response model of Eq. (2) using the  $m_{99\%}$  as response criteria.

|                                   | <b><i>K</i></b> | <b><i>m</i><sub>50%</sub> or <i>m</i><sub>99%</sub></b> | <b><i>a</i></b> | <b><i>R</i><sup>2</sup></b> |
|-----------------------------------|-----------------|---------------------------------------------------------|-----------------|-----------------------------|
| <i>Extraction yield</i>           | 54.96±3.85      | 258.40±25.24                                            | 0.22±0.02       | 0.9241                      |
| <i>Hydrolysable tannins (Hta)</i> | 85.73±5.14      | <u>165.69</u> ±7.12                                     | 0.86±0.01       | 0.9836                      |
| <i>Flavonoids (Fla)</i>           | 35.35±4.45      | 31.01±3.89                                              | 0.44±0.03       | 0.9436                      |
| <i>Total Phenolics (Phe)</i>      | 205.40±18.49    | <u>337.80</u> ±11.56                                    | 0.33±0.01       | 0.9482                      |
| <i>Compound P5</i>                | 8.65±0.78       | <u>112.81</u> ±3.39                                     | 0.84±0.08       | 0.9479                      |
| <i>Compound P7</i>                | 47.62±2.38      | <u>124.35</u> ±7.39                                     | 0.79±0.08       | 0.9696                      |
| <i>Compound P8</i>                | 17.92±1.43      | 10.28±0.72                                              | 0.43±0.01       | 0.9189                      |
| <i>Compound P9</i>                | 4.31±0.30       | 379.82±25.19                                            | 1.00±0.05       | 0.9457                      |
| <i>Compound P11</i>               | 3.12±0.09       | 253.13±24.25                                            | 1.02±0.09       | 0.9249                      |
| <i>Compound P13</i>               | 3.58±0.29       | 17.62±0.18                                              | 0.44±0.01       | 0.9563                      |
| <i>Compound P14</i>               | 2.58±0.13       | 28.93±0.29                                              | 0.94±0.09       | 0.8648                      |
| <i>Compound P1,2,3,4,6,10,12</i>  | 116.59±8.16     | <u>482.16</u> ±8.89                                     | 0.79±0.04       | 0.9676                      |
